# Supplementary material
Source: PubMed Central journal article supplement (PMC4295795)
Supplement: bi500325n_si_001.pdf [file bi500325n_si_001.pdf]

## Supporting Information

### Nanomechanical property maps of breast cancer cells by multi-harmonic atomic force microscopy reveal Syk-dependent changes in microtubule stability mediated by MAP1B

Mariya O. Krisenko, Alexander Cartagena, Arvind Raman, and Robert L. Geahlen

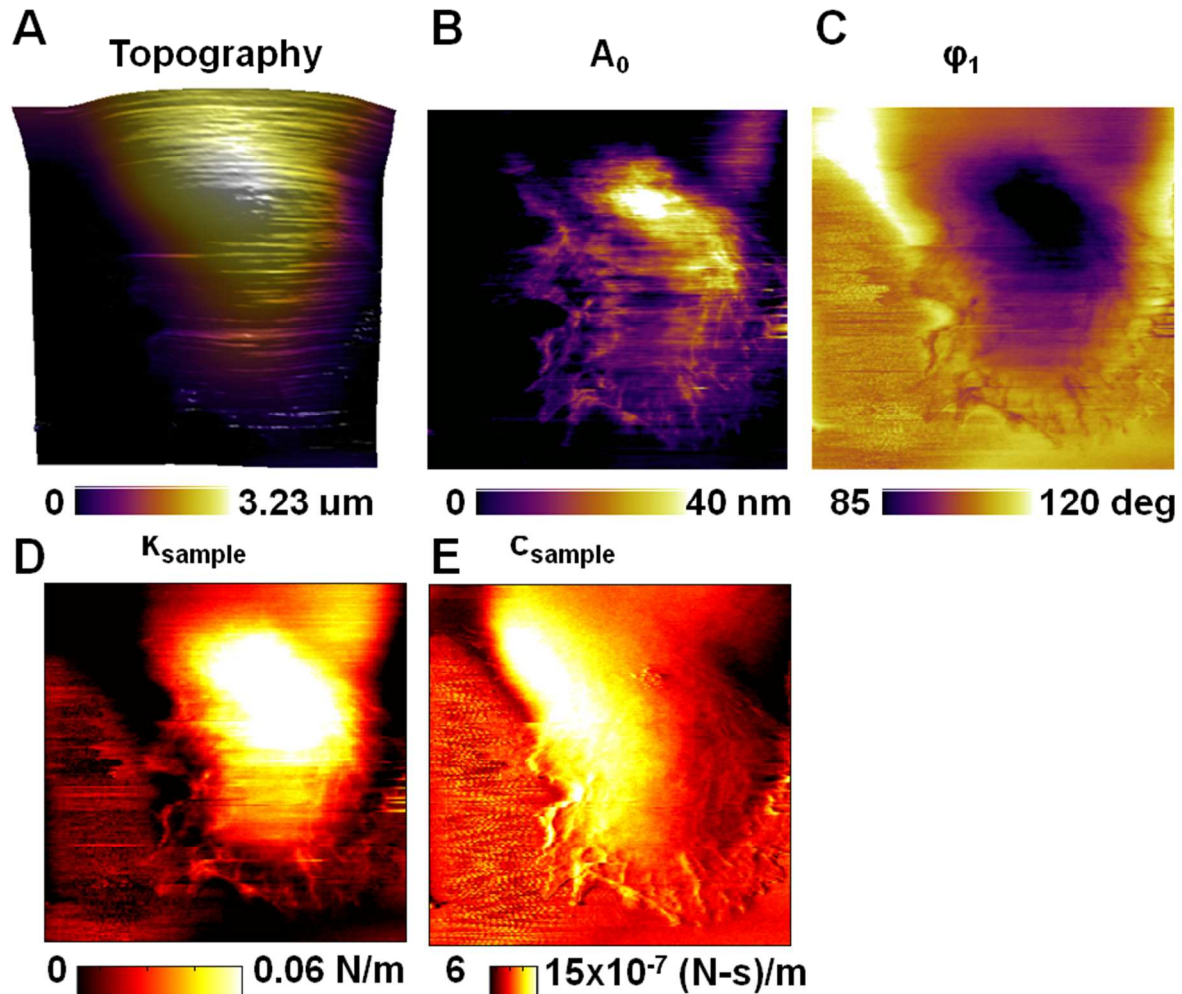

**Supplemental Figure S1.** High-resolution (256×256 pixels) AM-AFM images showing material compositional contrast in a cell expressing Syk-EGFP. Shown is a topography image (A), compositional contrast images of mean cantilever deflection  $A_0$  (B) and phase lag ( $\phi_1$ ) (C), and maps of extracted local nanomechanical properties of dynamic stiffness  $k_{\text{sample}}$  (D) and damping  $c_{\text{sample}}$  (E).

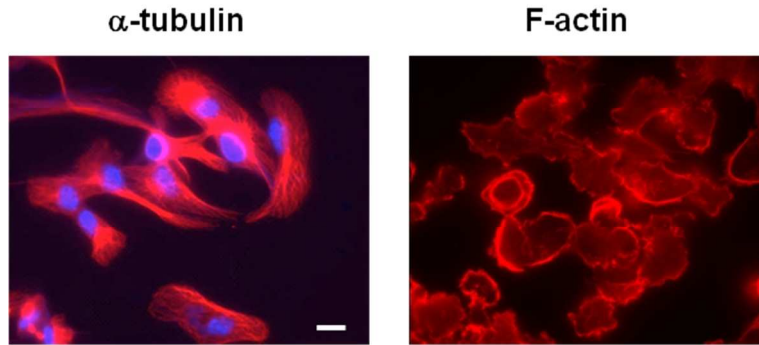

**Supplemental Figure S2.** Fluorescence microscopy of cytoskeletal networks. MDA-MB-231 cells induced to express Syk-EGFP were fixed and stained with antibodies against  $\alpha$ -tubulin or with rhodamine-phalloidin to stain F-actin. Bar = 10  $\mu$ m.

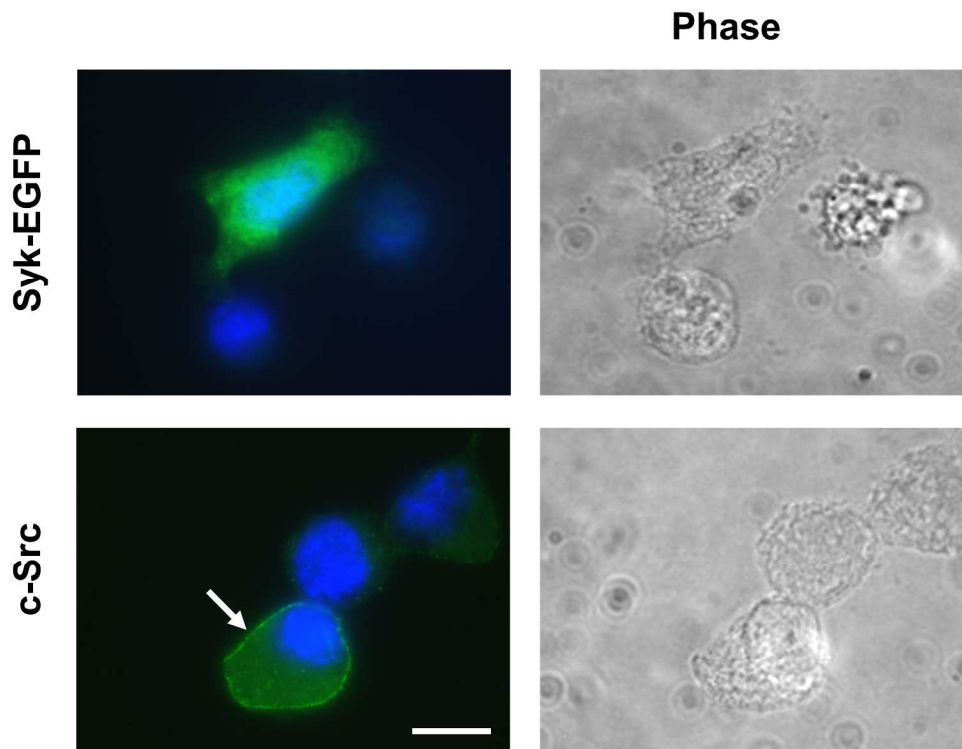

**Supplemental Figure S3.** Syk, but not c-Src, protects cells from nocodazole-induced rounding. MDA-MB-231 cells were transiently transfected to express Syk-EGFP or c-Src and treated with nocodazole. Syk-EGFP was detected by fluorescence and c-Src by immunofluorescence (green). Nuclei were detected by staining with DAPI (blue). An example of a cell over-expressing c-Src is indicated by the arrow. Bar = 10  $\mu$ m.

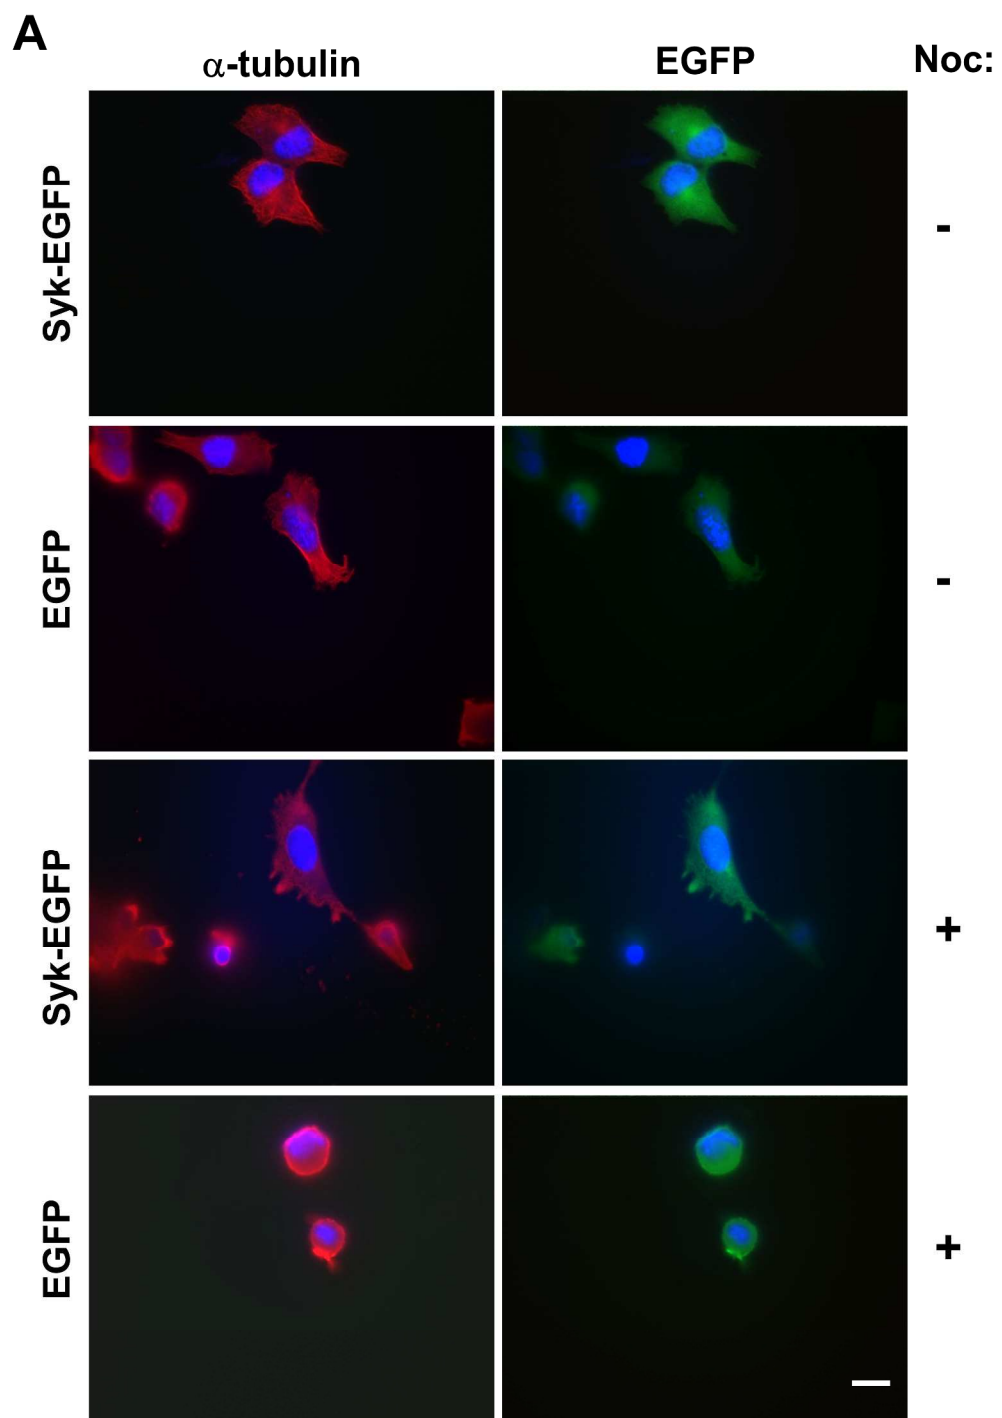

**B**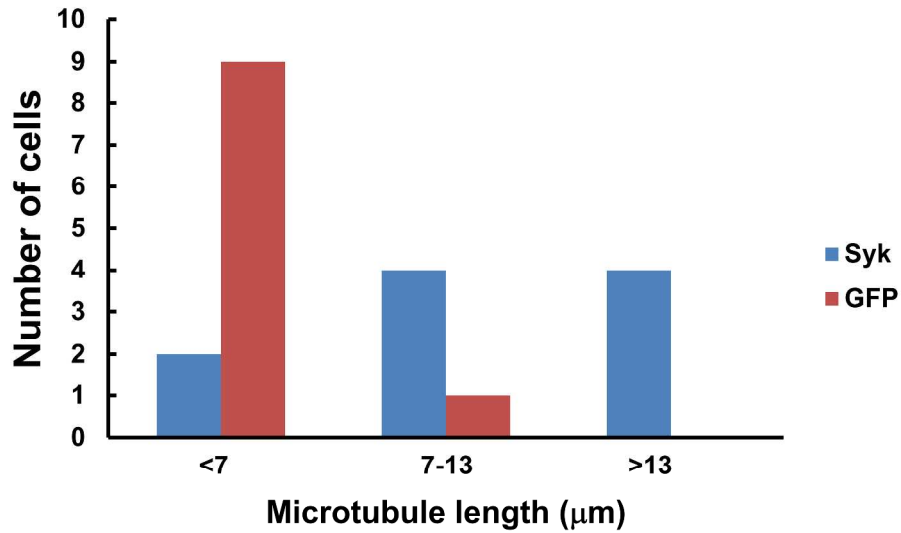

**Supplemental Figure S4.** Stabilization of microtubules through the expression of Syk in BT549 breast cancer cells. (A) BT549 cells were transiently transfected with expression plasmids for Syk-EGFP or enhanced green fluorescent protein (EGFP) and treated without (-) or with (+) nocodazole. Cells were fixed and stained with an antibody against  $\alpha$ -tubulin and a fluorescently tagged secondary antibody, and with DAPI to mark the nucleus. Cells were examined by fluorescence microscopy to detect  $\alpha$ -tubulin (red), nuclei (blue) and Syk-EGFP or EGFP (green). Bar = 10  $\mu$ m. (B) The distance ( $\mu$ m) from the cell nucleus to the cell boundary as marked by  $\alpha$ -tubulin fluorescence was measured for cells expressing Syk-EGFP (Syk) or EGFP (GFP). Cells were grouped into three categories as indicated.

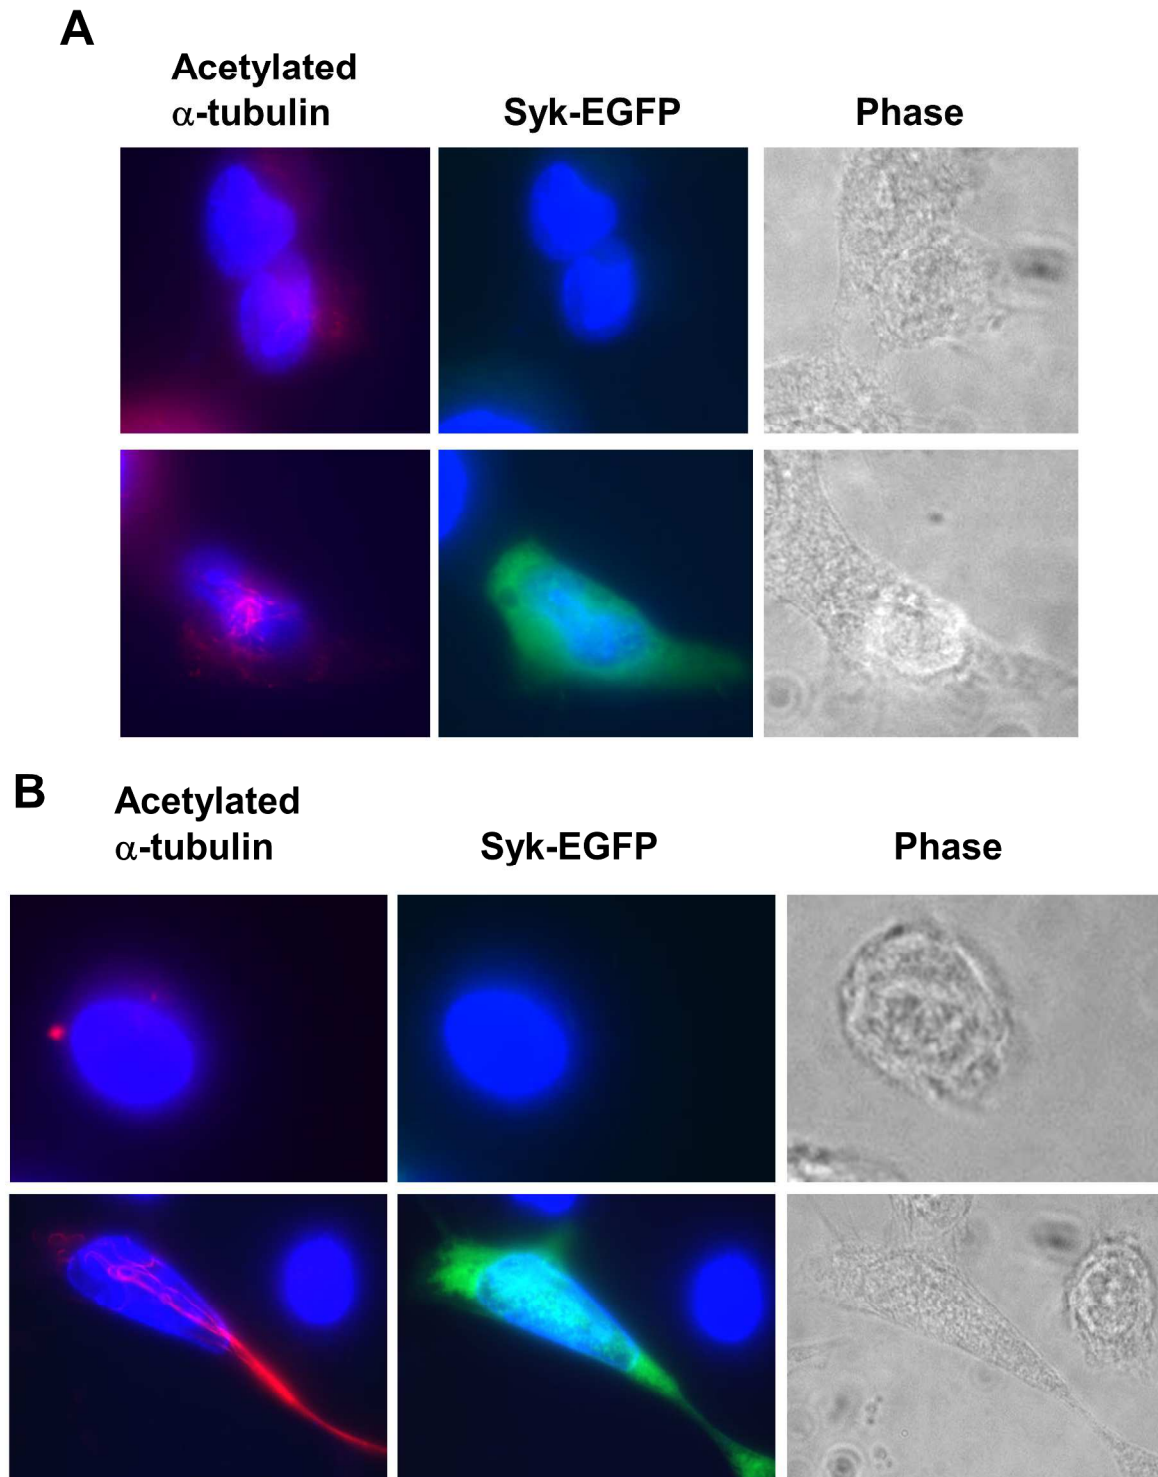

**Supplemental Figure S5.** Transient transfection of Syk enhances the stability of acetylated microtubules. MDA-MB-231 cells lacking (upper panels) or expressing Syk-EGFP (lower panels) and treated without (A) or with (B) nocodazole were fixed and stained with an antibody against acetylated  $\alpha$ -tubulin and a fluorescently tagged secondary antibody, and with DAPI to

mark the nucleus. Cells were examined by phase contrast (phase) and fluorescence microscopy to detect  $\alpha$ -tubulin (red), nuclei (blue) and Syk-EGFP (green).

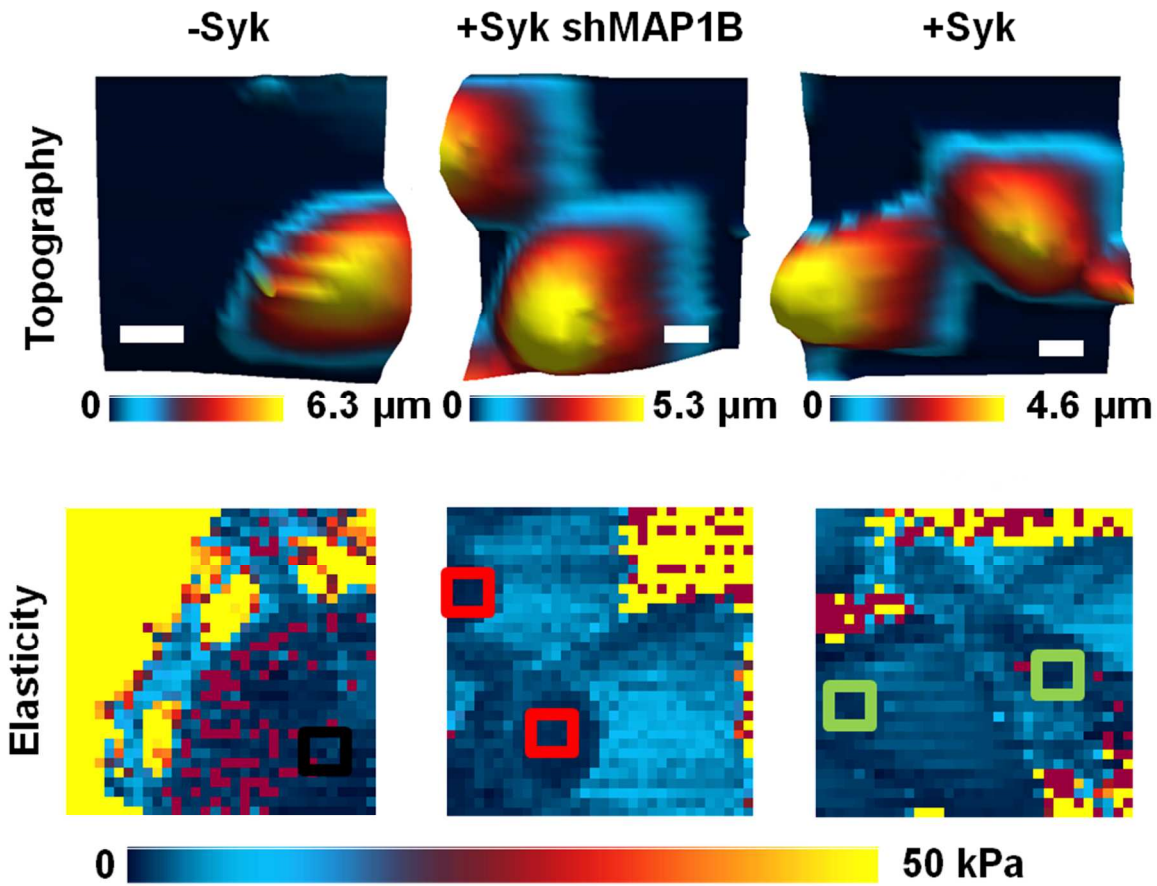

**Supplemental Figure S6.** Knockdown of MAP1B attenuates the Syk-dependent changes in cellular phenotype. Topographic images (upper panels) and elasticity maps (lower panels) of MDA-MB-231 cells lacking Syk (-Syk) or expressing Syk (+Syk) without or with shRNA directed against MAP1B (shMAP1B) were acquired by AFM using force-volume mode. On the elasticity maps are insets (squares) marking the locations of  $3 \times 3$  pixels extracted to analyze the resulting cell height and elasticity. Images were taken at a trigger force of 2nN,  $32 \times 32$  pixels. Bar = 10  $\mu\text{m}$ .

**Supplemental Table SI** – Sites of tyrosine phosphorylation identified on MAP1B

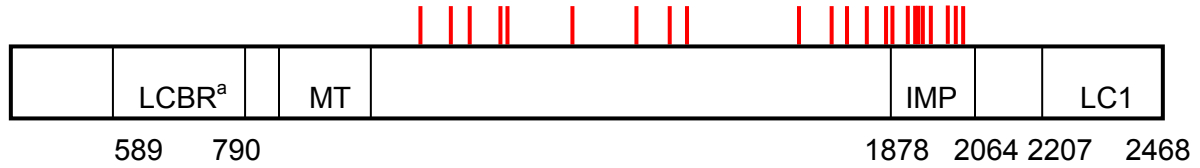

| Site sequence                          | Cell line <sup>b</sup> | YXXL/I |
|----------------------------------------|------------------------|--------|
| LKETEPVEAyVIQK                         | 231, DG75              | No     |
| FEDEGAGFEESSETGDyEEK                   | DG75                   | No     |
| HSPTEDEESAKAEADAyIR                    | DG75                   | No     |
| MEAEYyVMAVVDK                          | DG75                   | No     |
| AAEAGGAEEQyGFLTTPTK                    | DG75                   | Yes    |
| TDATDGKdyNASASTISPPSSMEEDKFSR          | 231                    | No     |
| TLEVVSPSQSVTGSAGHTPyYQSPTDEK           | 231                    | No     |
| SPPLIGSESAyESFLSADDK                   | 231, DG75              | No     |
| QGSPDQVSPVSEMTSTSLyQDKQEGK             | 231                    | No     |
| QSPDHPTVGAGVLHITENGPTeVDySPSDMQDSSLSHK | 231                    | No     |
| DMSLyASLTSEK                           | DG75                   | Yes    |
| ESSPLySPTFSDSTSAVK                     | 231, DG75              | No     |
| TATCHSSSSPPIDAASAEPyGFR                | 231, DG75              | No     |
| TPGDFSYAyQKPEETTR                      | 231, DG75              | No     |
| SPDEEDYDyESYEK                         | 231                    | No     |
| TPQASTYSyETSdLCyTAEK                   | 231, DG75              | No     |
| TPEDGDySYEIIeK                         | DG75                   | No     |
| TPEDGDYSyEIIeK                         | 231, DG75              | Yes    |
| TPEEGGySYDISEK                         | 231, DG75              | No     |
| TTSPPEVSGySYEK                         | 231, DG75              | No     |
| LLDDISNGYDDSEdGGHTLGDPsYsYETTEK        | 231                    | No     |
| ITSFPESEGYSyETSTK                      | 231, DG75              | No     |
| TPDTSTYCyETAeK                         | 231                    | No     |

<sup>a</sup>Regions of MAP1B are: light chain binding region (LCBR), microtubule binding region (MT), imperfect repeat region (IMP) and light chain-1 (LC1).

<sup>b</sup>Cell lines reported are DG75 human B cell lymphoma (DG75) or MDA-MB-231 human breast carcinoma (231).<sup>44,45</sup>
